1

2 **Detailed analyses of stall force generation in *Mycoplasma mobile* gliding**

3

4 **Masaki Mizutani<sup>a</sup>, Isil Tulum<sup>a,b</sup>, Yoshiaki Kinoshita<sup>c</sup>, Takayuki Nishizaka<sup>c</sup> and**  
5 **Makoto Miyata<sup>a,b</sup>**

6

7 <sup>a</sup> Graduate School of Science, Osaka City University, 3-3-138 Sugimoto, Sumiyoshi-ku,  
8 Osaka 558-8585, Japan

9 <sup>b</sup> The OCU Advanced Research Institute for Natural Science and Technology  
10 (OCARINA), Osaka City University, 3-3-138 Sugimoto, Sumiyoshi-ku, Osaka 558-  
11 8585, Japan

12 <sup>c</sup> Department of Physics, Faculty of Science, Gakushuin University, 1-5-1 Mejiro,  
13 Toshima-ku, Tokyo 171-8588, Japan

14

15 Corresponding author: (Makoto Miyata, Graduate School of Science, Osaka City  
16 University, 3-3-138 Sugimoto, Sumiyoshi-ku, Osaka 558-8585, Japan, +81-6-6605-  
17 3157, [miyata@sci.osaka-cu.ac.jp](mailto:miyata@sci.osaka-cu.ac.jp))

18

19 **Keywords:** gliding motility, optical tweezers, force measurement, gear ratio, energy  
20 conversion

21

22 **ABSTRACT**

23 *Mycoplasma mobile* is a bacterium that uses a unique mechanism to glide on solid  
24 surfaces at a velocity of up to 4.5  $\mu\text{m/s}$ . Its gliding machinery comprises hundreds of  
25 units that generate the force for gliding based on the energy derived from ATP; the units  
26 catch and pull on sialylated oligosaccharides fixed to solid surfaces. In the present  
27 study, we measured the stall force of wild-type and mutant strains of *M. mobile* carrying  
28 a bead manipulated using optical tweezers. The strains that had been enhanced for  
29 binding exhibited weaker stall forces than the wild-type strain, indicating that stall force  
30 is related to force generation rather than to binding. The stall force of the wild-type  
31 strain decreased linearly from 113 to 19 pN following the addition of 0–0.5 mM free  
32 sialyllactose (a sialylated oligosaccharide), with a decrease in the number of working  
33 units. Following the addition of 0.5 mM sialyllactose, the cells carrying a bead loaded  
34 using optical tweezers exhibited stepwise movements with force increments. The  
35 force increments ranged from 1 to 2 pN. Considering the 70-nm step size, this small  
36 unit force may be explained by the large gear ratio involved in the *M. mobile* gliding  
37 machinery.

38

39 **SIGNIFICANCE**

40 *Mycoplasma* is a genus of bacteria that parasitizes animals. Dozens of *Mycoplasma*  
41 species glide over the tissues of their hosts during infection. The gliding machinery of  
42 *Mycoplasma mobile*, the fastest species, includes intracellular motors and hundreds of  
43 legs on the cell surface. In the present study, we precisely measured force generation  
44 using a highly focused laser beam arrangement (referred to as optical tweezers) under  
45 various conditions. The measurements obtained in this study suggest that the rapid  
46 gliding exhibited by *M. mobile* arises from the large gear ratio of its gliding machinery.

47

48 **INTRODUCTION**

49 Members of the bacterial class *Mollicutes*, which includes the genus *Mycoplasma*, are  
50 parasitic and occasionally commensal bacteria that are characterized by small cells and  
51 genomes, and by the absence of a peptidoglycan layer (1, 2). Dozens of parasitic  
52 *Mycoplasma* species, such as the fish pathogen *Mycoplasma mobile* (3-5) and the  
53 human pathogen *Mycoplasma pneumoniae* (6-8), have protrusions, and exhibit gliding

54 motility in the direction of the protrusions on solid surfaces, which enables  
55 mycoplasmas to parasitize other organisms. Interestingly, *Mycoplasma* gliding does  
56 not involve flagella or pili, and is completely unrelated to other bacterial motility  
57 systems, or the conventional motor proteins that are common in eukaryotic motility.  
58 *M. mobile*, which can be isolated from the gills of freshwater fish, is a fast-gliding  
59 *Mycoplasma* (9-13). It glides smoothly and continuously on glass at an average speed  
60 of 2.0–4.5  $\mu\text{m/s}$ , or 3–7 times the length of the cell per second. A working model,  
61 called the centipede or power-stroke model, has been proposed to explain the gliding  
62 mechanism of *M. mobile*: the cells repeatedly catch, pull, drag, and release the sialylated  
63 oligosaccharides (SOs) on solid surfaces (3-5, 14). The gliding machinery comprises  
64 internal and surface structures (15-19). The internal structure includes the  $\alpha$ - and  $\beta$ -  
65 subunit paralogs of F-type ATPase/synthase, and generates the force for gliding, based  
66 on the energy derived from ATP (18-22). The force is probably transmitted across the  
67 cell membrane to the surface structure, which is composed of at least three huge  
68 proteins, Gli123, Gli521, and Gli349 (15-17, 23). Gli521, the crank protein, transmits  
69 the interior force of the cell to Gli349, with actual structural changes (17, 24). Gli349,  
70 the leg protein, extends after thermal fluctuation, and catches the SOs, which are the  
71 predominant structures on animal cell surfaces (Fig 1A) (9, 25-27). The cells always  
72 glide in the direction of the machinery, which may be a result of the directed binding of  
73 the cells on solid surfaces (3, 28). In theory, hundreds of gliding units on the cell  
74 surface should act cooperatively to enable smooth gliding (Fig. 1B) (15, 27, 29). To  
75 examine this working model in detail, it is necessary to investigate the behavior of the  
76 individual units. Recently, the discrete movements involved in gliding motility, which  
77 are possibly attributable to single leg movements, have been observed by controlling the  
78 working leg number following the addition of free SOs (22, 27). In the current study,  
79 we focused on the pulling force exerted on the solid surface, because the generation of  
80 force has not been properly investigated, with the exception of the final stall force of the  
81 wild-type strain (11). Therefore, in the present study, we quantitatively measured the  
82 pulling forces of several strains of whole cells under various conditions using optical  
83 tweezers (11, 28, 30-32), and characterized the force generated by the gliding  
84 machinery.  
85

## 86 RESULTS

87 **Stall force measurement.** The propelling force in *M. mobile* cells has been measured  
88 using optical tweezers (11). A bead bound to a cell was trapped by a highly focused  
89 laser beam, and the force was calculated by measuring the distance between the center  
90 of the bead and the trap; the force acting on the bead increased linearly with the  
91 displacement from the trap center (11, 28, 32). In the present study, *M. mobile* cells,  
92 which had been biotinylated and suspended in phosphate-buffered saline with glucose  
93 (PBS/G), were inserted into a tunnel chamber. Polystyrene beads coated with avidin  
94 (1- $\mu\text{m}$  in diameter) were subsequently added to the tunnel. A bead trapped using  
95 optical tweezers was attached to the back end of the gliding cell by exploiting the  
96 avidin–biotin interaction (28, 33, 34). The cell pulled the bead from the trap center  
97 (Fig. 2A and Movie S1). Starting from 0 s, the pulling force increased and reached a  
98 plateau at approximately 40 s. The maximum value of the average of 25 data points  
99 was used as the stall force (Fig. 2B). The stall force of the wild-type strain was  $113 \pm$   
100  $32$  pN ( $n = 50$ ).

101 To determine the proteins involved in force generation or force transmission, we  
102 measured the stall force in the wild-type strain of *M. mobile* to compare it with that in  
103 six previously isolated strains with known gliding speeds and/or binding activities (12,  
104 21, 35). The *gli521* (P476R) mutant of protein Gli521 has a single amino acid  
105 substitution (proline for arginine at the 476th position) (21), but mutations in other  
106 strains have not been described. The pulling forces of the mutants increased from 0 s  
107 and stalled at 20–50 s. The stall force of the m14 strain— $110 \pm 29$  pN ( $n = 29$ )—was  
108 not significantly different from that of the wild-type strain ( $P = 0.1 > 0.05$ , according to  
109 the Student's *t*-test). The stall forces of the *gli521* (P476R), m6, m27, m29, and m34  
110 mutants were significantly reduced to 64–81% of that of the wild-type strain ( $P = 6 \times$   
111  $10^{-3}$ ,  $4 \times 10^{-4}$ ,  $9 \times 10^{-5}$ ,  $8 \times 10^{-9}$ , and  $4 \times 10^{-4}$ , respectively;  $P < 0.01$ , according to the  
112 Student's *t*-test) (Fig. 2B *Inset*). The *gli521* (P476R) mutant, which was characterized  
113 by enhanced binding, exhibited a smaller force than the wild-type strain, suggesting that  
114 the stability of binding is not the only determinant of stall force.

115

116 **Genome sequencing of various strains.** To determine the proteins and mutations  
117 associated with the decreases in stall force, we sequenced the genomes of the strains

118 using a MiSeq sequencer. The genome of the *gli521* (P476R) mutant has been  
119 sequenced for a 30,469-bp DNA region encoding four open reading frames (ORFs):  
120 *gli123*, *gli349*, *gli521*, and *gli42*. However, the other regions remain unknown (21).  
121 The genome sequencing result for the *gli521* (P476R) mutant was consistent with the  
122 previous report of the mutation in *gli521* (21), and showed additional mutations in other  
123 regions (Table S1). One of the additional mutations causes an amino acid substitution  
124 in MvspB, a surface protein (23, 36-39). However, the reduced stall force should be  
125 caused by the mutation in Gli521, because MvspB accounts for only 1.2% of the mass  
126 of all the surface proteins, and the antibody against an abundant and closely related  
127 protein, MvspI, did not influence the gliding motility (23, 39). The genomes of the  
128 m6, m14, m27, m29, and m34 strains have not been sequenced yet, and we identified  
129 various mutations in the present study. We suggest that the decrease in the stall force  
130 in the m27 strain in the present study was caused by the mutation in *gli521*. All the  
131 strains had the same single amino acid substitution (serine to isoleucine) as the 354th  
132 residue in MMOB1700, a homolog of ABC transporter permease based on a Basic  
133 Local Alignment Search Tool (BLAST) search. This mutation may have been derived  
134 from a substitution that occurred on the clone used for the reported genome sequencing,  
135 because it was derived from the same origin (ATCC 43663) as the present study (36).  
136 Interestingly, MMOB1700 exhibited 5 other mutations in the 10 strains analyzed,  
137 suggesting a special mechanism that causes a high rate of mutation in this gene. Next,  
138 we sequenced the genomes of nonbinding strains m12, m13, and m23, which have  
139 mutations in *gli123*, *gli349*, and *gli349*, respectively (12, 15, 16, 35). Genome  
140 sequencing revealed that the identified mutations were consistent with a previous report  
141 (35), although additional mutations were identified in other regions.

142

143 **Binding and gliding of various strains.** To systematically clarify the relationship  
144 between the features and mutation in the genome, we examined the binding activities  
145 and the gliding speeds for the wild-type, *gli521* (P476R), m6, m14, m27, m29, and m34  
146 mutants, which can glide. The cell suspensions were adjusted to the same optical  
147 density and inserted into a tunnel chamber. After 15 min, we videoed the cells to  
148 count the numbers on the glass for the bound-cell ratio, and to determine their gliding  
149 speed, as previously reported (Fig. 3A) (29, 35, 40). The binding activities and the

150 gliding speeds were averaged for 20 independent images and 100 cells, respectively.  
151 The binding activity and gliding speed of the *gli521* (P476R) mutant were consistent  
152 with those reported in the previous study (35). Other strains have not been analyzed  
153 by the method used here. The characteristics of the binding activities allowed  
154 classification of the strains into three groups (Fig. 3B left): (i) m6 had 44% of the  
155 activity of the wild-type strain; (ii) m14, m27, and m29 had 80%, 92%, and 73% of the  
156 activity, respectively; and (iii) the *gli521* (P476R) and m34 mutants had 159% and  
157 145% of the activity of the wild-type strain, respectively. We compared these data to  
158 the binding activities previously estimated from hemadsorption, the adsorption of  
159 erythrocytes onto the surface of colonies (12). The hemadsorption values of m6, m14,  
160 m27, m29, and m34 were 24%, 93%, 113%, 96%, and 122%, respectively; i.e., except  
161 for m27, they were consistent with the results of the analyses in the present study. The  
162 gliding speed of the wild-type strain was  $3.7 \pm 0.2 \mu\text{m/s}$  and the relative gliding speeds  
163 of the mutants ranged from 80% to 103% of the wild-type strain, showing that the  
164 gliding speeds differed less than the binding activities (Fig. 3B right). Of the strains  
165 enhanced for binding, the *gli521* (P476R) and m34 mutants had reduced stall forces,  
166 suggesting that stall force is not determined simply by binding activity.  
167 Interestingly, we noticed that the proportions of the nongliding bound cells were much  
168 higher in the m6, m14, m27, and m29 strains than in the wild-type strain. The  
169 proportion of nongliding cells in the cells on glass was 6% for the wild-type strain, as  
170 previously reported (40), but those for the m6, m27, and m29 strains were higher (18%,  
171 19%, and 16%, respectively), and that of the m14 strain was much higher (62%) (Fig.  
172 S1). This observation can be explained by assuming that gliding can be achieved by  
173 the concerted action of many molecules and interactions.

174

175 **Effect of SOs on stall force.** An *M. mobile* cell glides as a result of the integrated  
176 movement of its many legs. However, if the number of working legs is reduced, it is  
177 possible to detect the pulling force of single unit. Previous studies have shown that the  
178 number of working legs can be reduced by adding free SOs (9, 22, 25, 27, 40, 41). We  
179 therefore added various concentrations of free sialyllactose (SL)—an SO—to gliding *M.*  
180 *mobile* cells, and measured the stall force at 200 and 500 frames/s with 0–0.25, 0.33,  
181 and 0.5 mM free SL. The cells reached a plateau after 30–40 s, and the time taken to

182 reach the stall increased with the concentration of free SL. The stall force decreased  
183 from 113 to 19 pN following the addition of up to 0.50 mM free SL (Fig. 4A and B).  
184 These results suggest that the stall force is the sum of the pulling force of many units.  
185  
186 To detect the pulling force attributable to smaller numbers of units, we reduced the laser  
187 power of the optical tweezers to achieve a higher trace resolution. In this experiment,  
188 we applied 0.25 mM SL with a reduction of the trap stiffness of the optical tweezers  
189 from 0.5–0.7 to 0.1 pN/nm, whereby the trapped cells were able to escape from the trap  
190 center, and then measured the force under these conditions. The force increments with  
191 repeated small peaks were detected, and the peaks were measured using a peak-finding  
192 algorithm, as summarized in Fig. 5A. The distribution of these increments was  
193 determined by fitting the sum of four Gaussian curves whose peaks were positioned at  
194 1.1, 2.0, 3.2, and 4.4 pN (Fig. 5B). The peaks were positioned at twice, three, and four  
195 times the value of the first peak, suggesting that these peaks reflect single, double,  
196 triple, and quadruple the minimum force increment (42). In the same way, the  
197 individual increments were analyzed for the *gli521* (P476R) mutant, and were also  
198 determined by fitting the sum of four Gaussian curves whose peaks were positioned at  
199 0.9, 1.8, 2.6, and 3.5 pN (Fig. 5B).

200  
201 **Stepwise force increments.** Because the force increments were detected for limited  
202 leg numbers, it was possible to derive the force increments from the force generated by  
203 a single leg or a minimum force generation unit. Next, we added 0.50 mM SL to limit  
204 the number of working legs, and reduced the trap stiffness to 0.06–0.07 pN/nm to detect  
205 the minimum force increments more precisely. Very small ratios of cells remained on  
206 the glass surface under these conditions, and we attached a bead to the cells using the  
207 optical tweezers. Displacements were detected in 51 of 63 cells. Eight cells glided  
208 by creeping displacements with occasional discontinuous increments, which were  
209 mostly stepwise (Fig. 6A) and sometimes exhibited small peaks, as shown in Figure 5.  
210 Three cells exhibited force increments with more than six continuous steps (Fig. 6B and  
211 Movie S2). The average value of the force increments from 46 steps or peaks in 11  
212 cell trajectories was  $1.45 \pm 0.44$  pN (Fig. 6C). These results suggest that the minimum  
213 force increment was 1–2 pN, which should be the minimum unit force for gliding.

214

## 215 **DISCUSSION**

216 **Mutations influencing gliding.** In the present study, we sequenced the whole  
217 genomes of *M. mobile* mutants characterized by binding ability, gliding motility, and  
218 colony spreading. Based on these results, we propose the proteins responsible for or  
219 related to these characteristics. The m6 strain, which exhibited reduced binding, a  
220 lower gliding speed, and a weaker stall force, has mutations in FtsH, MvspI, and SecY  
221 (37-39, 43, 44). The substituted amino acid in FtsH is not conserved in other  
222 mycoplasmas except for *Mycoplasma pulmonis*, a closely related species. MvspI is  
223 probably not involved in gliding, as described above (23). SecY is generally essential  
224 for protein secretion in bacteria (44). The substitution in SecY probably affects the  
225 secretion of gliding proteins, resulting in a reduction in the binding activity of cells,  
226 because the amino acid substituted in the mutant is conserved in many mycoplasmas,  
227 including *Mycoplasma hominis*, *Mycoplasma bovis*, and *M. pulmonis*. The m14 strain  
228 was characterized by reduced binding and gliding, and its glucokinase, which  
229 phosphorylates glucose to glucose-6-phosphate at the first step of glycolysis, has an  
230 amino acid substitution (45). Interestingly, the m14 colony was less well dispersed  
231 than the wild-type colony, suggesting that glucokinase is related to gliding including  
232 chemotaxis, because colony shape is largely influenced by motility in many bacteria  
233 (12). The m27 strain, which was characterized by a small proportion of gliding cells,  
234 has a substitution at the 1461st amino acid of a total 4727 amino acids in the coded  
235 Gli521 protein, suggesting that the structure around this position is indispensable for  
236 gliding. The m34 strain was characterized by enhanced binding, and has a substitution  
237 in the conserved amino acid of the  $\beta$  subunit of F-type ATPase (46). The membrane  
238 potential may be related to binding activity, because F-type ATPase is responsible for  
239 the membrane potential in *M. mobile*.

240

241 **Cell behavior in stall.** Each cell was stalled using optical tweezers focused on the  
242 bead bound to the back end of the cell. What events can be expected in the stall?  
243 The stall force decreased with the addition of free SL (Fig. 4). This observation  
244 suggests that the legs repeatedly catch, pull, and release SOs, even in the stalled state  
245 (Fig. 7), because the force under free SOs should increase to the stall force in the



246 absence of SOs if the legs do not detach in stall. In our gliding model, it was  
247 suggested that the legs detach as a result of the tension caused by continuous cell  
248 displacement in gliding (14, 28, 41). The putative detachment in the stall may suggest  
249 that directed detachment occurs with much shorter displacement than expected from a  
250 95-nm long leg structure, because the detachment also occurs in the stall. This  
251 assumption can explain the observation that the *gli521* (P476R) and m34 mutants  
252 exhibited a smaller stall force than the wild-type strain, although they had a higher ratio  
253 of cells bound to the glass (Fig. 2 and 3). The higher ratio of bound cells was probably  
254 due to the reduced force required to detach the post-stroke legs.

255

256 **Unit number of gliding machinery.** The minimum force increment did not change  
257 significantly with the distance from the laser. Because the force increments occurred  
258 additionally to the previous ones, the gliding unit should have generated the same force  
259 constantly over a rather long distance ranging from 0 to 200 nm (Fig. 6).

260 In the present study, the stall force and the minimum force increments of a cell were  
261 approximately 113 and 1.5 pN, respectively (Fig. 2B and 6C). Previously, the number  
262 of legs in *M. mobile* was estimated to be 450 (16). The number of working units was  
263 calculated from the stall force and the minimum force increments of a cell; 113 over 1.5  
264 pN is calculated to be approximately 75-fold, suggesting that 75 minimum units can  
265 work simultaneously. Assuming that the minimum unit of force corresponds to a  
266 single molecule of Gli349, one-sixth of the Gli349 molecules simultaneously suggested  
267 to participate in force generation in the stalled state (Fig. 1B). The friction occurring at  
268 the interface between an *M. mobile* cell and water flow in the interlamellar of a carp gill  
269 is calculated to be 34 pN for the maximum, based on Stokes' law (11, 47). This  
270 number is three-fold smaller than the stall force of a cell, suggesting that a cell can glide  
271 against water flow using the force generated by the simultaneous strokes of many legs.

272

273 ***M. mobile* gliding is characterized by large steps and a small force.** We compared  
274 the step size and the force of *M. mobile* gliding with those of conventional motor  
275 proteins such as myosin, dynein, and kinesin, which perform stepwise movements along  
276 the rail proteins driven by the energy derived from ATP. The step sizes and the forces  
277 of myosin-II, cytoplasmic dynein, kinesin, and myosin-V have been reported as 5.3, 8,

278 8, and 36 nm, and 3–5, 7–8, 8, and 2–3 pN, respectively (48-53). The long step and  
279 small force of myosin-V are caused by the lever effect of 26-nm arms (54). The step  
280 size of *M. mobile* is 70 nm; much larger than that of conventional motor proteins (22).  
281 The minimum unit force calculated here (1–2 pN) suggests the gear effect in the gliding  
282 machinery. Gli521, which is the force transmitter, forms a triskelion with 100-nm  
283 arms (24), and Gli349, which is the leg, is shaped like an eighth note in musical notation  
284 with a 50-nm flexible string (26, 55), suggesting that these proteins cause the lever  
285 effects.

286

287 **Energy conversion efficiency of *M. mobile* gliding.** The direct energy source for *M.*  
288 *mobile* gliding is ATP; based on experiments that permeabilize cells, a “gliding ghost”  
289 can be reactivated by ATP (21). A gliding ghost exhibits stepwise movement with a  
290 dwell time that is dependent on the ATP concentration used, suggesting that the step is  
291 coupled to ATP hydrolysis (22). Based on a minimum unit force of 1–2 pN and a  
292 spring constant of 0.06–0.07 pN/nm, the work done per step,  $W_{\text{step}}$ , is calculated to be 8–  
293 33 pN nm from the equation  $W_{\text{step}} = 1/2 \times \text{spring constant} \times \text{displacement}^2$ . Assuming  
294 that one ATP molecule is consumed per step, the energy conversion efficiency of *M.*  
295 *mobile* gliding can be calculated to be approximately 10–40%, because generally  
296 approximately 80 pN nm free energy is available from the hydrolysis of one ATP  
297 molecule.

298 F-type ATPase attains 100% energy conversion efficiency (56). It has been suggested  
299 that the gliding machinery of *M. mobile* is driven by the  $\alpha$ - and  $\beta$ -subunit paralogs of F-  
300 type ATPase (18). The force transmission from this motor to the solid surfaces through  
301 several large components including Gli521 and Gli349 may be related to the putative  
302 energy loss.

303

## 304 **MATERIALS AND METHODS**

305 **Strains and cultivation.** The *M. mobile* strain 163K (ATCC 43663) was used as the  
306 wild-type, and its 9 mutants were grown in Aluotto medium at 25°C, as previously  
307 described (12, 35, 40, 57).

308

309 **Surface modifications of *M. mobile* cells and polystyrene beads.** The cultured cells

310 were washed with PBS/G consisting of 75 mM sodium phosphate (pH 7.3), 68 mM  
311 NaCl, and 20 mM glucose, suspended in 1.0 mM Sulfo-NHS-LC-LC-biotin (Thermo  
312 Scientific, Waltham, MA) in PBS/G, and kept for 15 min at room temperature (RT), as  
313 previously described (28, 29, 33, 34, 40). Polystyrene beads (1.0  $\mu\text{m}$  in diameter)  
314 (Polysciences, Warrington, PA) were coated with avidin (Sigma-Aldrich, St. Louis,  
315 MO), as previously described (28).

316

317 **Force measurements.** The avidin-coated beads were attached to biotinylated cells in  
318 two different ways, according to the concentrations of free SL used in the experiments.  
319 In force measurements under 0–0.13 mM SL conditions, the biotinylated cells were  
320 inserted into a tunnel chamber that had been precoated with 10% horse serum (20, 27,  
321 29). Avidin-coated beads were sonicated, inserted into the tunnel chamber with various  
322 concentrations of free SL in PBS/G, and bound to the cells (32). In force  
323 measurements under 0.25–0.50 mM SL conditions, avidin-coated beads were sonicated  
324 and mixed with biotinylated cells in a microtube, and kept for 10–30 min at RT. Then,  
325 the mixture was inserted into a tunnel chamber and kept for 15 min at RT. The  
326 chamber was washed with PBS/G and the PBS/G was replaced by various  
327 concentrations of free SL in PBS/G. Both ends of the tunnel were sealed with nail  
328 polish. The bead movements were recorded at 200 or 500 frames/s and analyzed by  
329 displacement of up to 250 nm from the trap center (the linear range of the laser trap)  
330 using ImageJ 1.43u (<http://rsb.info.nih.gov/ij/>) and IGOR Pro 6.33J (WaveMetrics,  
331 Portland, OR) software packages (22, 28, 32, 58).

332

333 **Genome sequencing of the various strains.** All the strains were plated and isolated  
334 as previously described (19). The genomic DNAs were isolated using a QIAGEN  
335 DNeasy Blood & Tissue kit (QIAGEN, Hilden, Germany). The isolated genomic  
336 DNA was sequenced using MiSeq (Illumina Inc., San Diego, CA) and mapped by CLC  
337 Genomics Workbench 8 (QIAGEN, Hilden, Germany).

338

339 **Characterization of binding and gliding of the various strains.** All the strains were  
340 cultured to reach an optical density at 600 nm of 0.08. They were then suspended and  
341 inserted into a tunnel chamber (27, 29). Cell behavior was recorded and analyzed as

342 previously reported (27, 35).

343

344 **ACKNOWLEDGMENTS**

345 This work was supported by a Grant-in-Aid for Scientific Research in the innovative  
346 area “Harmonized Supramolecular Motility Machinery and Its Diversity” (MEXT  
347 KAKENHI; Grant Number 24117002), and by Grants-in-Aid for Scientific Research  
348 (B) and (A) (MEXT KAKENHI; Grant Numbers 24390107 and 17H01544) to MM.

349

350

351 **REFERENCES**

- 352 1. Razin S, Yogev D, & Naot Y (1998) Molecular biology and pathogenicity of  
353 mycoplasmas. *Microbiol Mol Biol Rev* 62(4):1094-1156.
- 354 2. Razin S & Hayflick L (2010) Highlights of mycoplasma research--an historical  
355 perspective. *Biologicals* 38(2):183-190.
- 356 3. Miyata M (2008) Centipede and inchworm models to explain *Mycoplasma* gliding.  
357 *Trends Microbiol* 16(1):6-12.
- 358 4. Miyata M (2010) Unique centipede mechanism of *Mycoplasma* gliding. *Annu Rev*  
359 *Microbiol* 64:519-537.
- 360 5. Miyata M & Hamaguchi T (2016) Prospects for the gliding mechanism of  
361 *Mycoplasma mobile*. *Curr Opin Microbiol* 29:15-21.
- 362 6. Nakane D, Kenri T, Matsuo L, & Miyata M (2015) Systematic structural analyses  
363 of attachment organelle in *Mycoplasma pneumoniae*. *PLoS Pathog*  
364 11(12):e1005299.
- 365 7. Miyata M & Hamaguchi T (2016) Integrated information and prospects for gliding  
366 mechanism of the pathogenic bacterium *Mycoplasma pneumoniae*. *Front Microbiol*  
367 7(960).
- 368 8. Kawamoto A, *et al.* (2016) Periodicity in attachment organelle revealed by electron  
369 cryotomography suggests conformational changes in gliding mechanism of  
370 *Mycoplasma pneumoniae*. *MBio* 7(2):e00243-00216.
- 371 9. Morio H, Kasai T, & Miyata M (2015) Gliding direction of *Mycoplasma mobile*. *J*  
372 *Bacteriol* 198(2):283-290.
- 373 10. Lee W, *et al.* (2015) Three-dimensional superlocalization imaging of gliding  
374 *Mycoplasma mobile* by extraordinary light transmission through arrayed nanoholes.  
375 *ACS Nano* 9(11):10896-10908.
- 376 11. Miyata M, Ryu WS, & Berg HC (2002) Force and velocity of *Mycoplasma mobile*  
377 gliding. *J Bacteriol* 184(7):1827-1831.
- 378 12. Miyata M, *et al.* (2000) Gliding mutants of *Mycoplasma mobile*: relationships  
379 between motility and cell morphology, cell adhesion and microcolony formation.  
380 *Microbiology* 146 (Pt 6):1311-1320.
- 381 13. Rosengarten R & Kirchhoff H (1987) Gliding motility of *Mycoplasma* sp. nov.  
382 strain 163K. *J Bacteriol* 169(5):1891-1898.

- 383 14. Chen J, Neu J, Miyata M, & Oster G (2009) Motor-substrate interactions in  
384 mycoplasma motility explains non-Arrhenius temperature dependence. *Biophys J*  
385 97(11):2930-2938.
- 386 15. Uenoyama A, Kusumoto A, & Miyata M (2004) Identification of a 349-kilodalton  
387 protein (Gli349) responsible for cytoadherence and glass binding during gliding of  
388 *Mycoplasma mobile*. *J Bacteriol* 186(5):1537-1545.
- 389 16. Uenoyama A & Miyata M (2005) Identification of a 123-kilodalton protein  
390 (Gli123) involved in machinery for gliding motility of *Mycoplasma mobile*. *J*  
391 *Bacteriol* 187(16):5578-5584.
- 392 17. Seto S, Uenoyama A, & Miyata M (2005) Identification of a 521-kilodalton protein  
393 (Gli521) involved in force generation or force transmission for *Mycoplasma mobile*  
394 gliding. *J Bacteriol* 187(3):3502-3510.
- 395 18. Nakane D & Miyata M (2007) Cytoskeletal “Jellyfish” structure of *Mycoplasma*  
396 *mobile*. *Proc. Natl. Acad. Sci. USA* 104(49):19518-19523.
- 397 19. Tulum I, Yabe M, Uenoyama A, & Miyata M (2014) Localization of P42 and F<sub>1</sub>-  
398 ATPase alpha-subunit homolog of the gliding machinery in *Mycoplasma mobile*  
399 revealed by newly developed gene manipulation and fluorescent protein tagging. *J*  
400 *Bacteriol* 196(10):1815-1824.
- 401 20. Jaffe JD, Miyata M, & Berg HC (2004) Energetics of gliding motility in  
402 *Mycoplasma mobile*. *J Bacteriol* 186(13):4254-4261.
- 403 21. Uenoyama A & Miyata M (2005) Gliding ghosts of *Mycoplasma mobile*. *Proc Natl*  
404 *Acad Sci USA* 102(36):12754-12758.
- 405 22. Kinoshita Y, *et al.* (2014) Unitary step of gliding machinery in *Mycoplasma mobile*.  
406 *Proc. Natl. Acad. Sci. USA* 111(23):8601-8606.
- 407 23. Kusumoto A, Seto S, Jaffe JD, & Miyata M (2004) Cell surface differentiation of  
408 *Mycoplasma mobile* visualized by surface protein localization. *Microbiology* 150(Pt  
409 12):4001-4008.
- 410 24. Nonaka T, Adan-Kubo J, & Miyata M (2010) Triskelion structure of the Gli521  
411 protein, involved in the gliding mechanism of *Mycoplasma mobile*. *J Bacteriol*  
412 192(3):636-642.
- 413 25. Nagai R & Miyata M (2006) Gliding motility of *Mycoplasma mobile* can occur by  
414 repeated binding to *N*-acetylneuraminyllactose (sialyllactose) fixed on solid

- 415 surfaces. *J Bacteriol* 188(18):6469-6475.
- 416 26. Adan-Kubo J, Uenoyama A, Arata T, & Miyata M (2006) Morphology of isolated  
417 Gli349, a leg protein responsible for *Mycoplasma mobile* gliding via glass binding,  
418 revealed by rotary shadowing electron microscopy. *J Bacteriol* 188(8):2821-2828.
- 419 27. Kasai T, *et al.* (2013) Role of binding in *Mycoplasma mobile* and *Mycoplasma*  
420 *pneumoniae* gliding analyzed through inhibition by synthesized sialylated  
421 compounds. *J Bacteriol* 195(3):429-435.
- 422 28. Tanaka A, Nakane D, Mizutani M, Nishizaka T, & Miyata M (2016) Directed  
423 binding of gliding bacterium, *Mycoplasma mobile*, shown by detachment force and  
424 bond lifetime. *MBio* 7(3):e00455-00416.
- 425 29. Nakane D & Miyata M (2012) *Mycoplasma mobile* cells elongated by detergent and  
426 their pivoting movements in gliding. *J Bacteriol* 194(1):122-130.
- 427 30. Ashkin A, Dziedzic JM, Bjorkholm JE, & Chu S (1986) Observation of a single-  
428 beam gradient force optical trap for dielectric particles. *Opt Lett* 11(5):288.
- 429 31. Nishizaka T, Miyata H, Yoshikawa H, Ishiwata S, & Kinoshita K, Jr. (1995)  
430 Unbinding force of a single motor molecule of muscle measured using optical  
431 tweezers. *Nature* 377(6546):251-254.
- 432 32. Mizutani M & Miyata M (2017) Force measurement on *Mycoplasma mobile*  
433 gliding using optical tweezers. *Bio-protocol* 7(3):e2127
- 434 33. Hiratsuka Y, Miyata M, & Uyeda TQ (2005) Living microtransporter by uni-  
435 directional gliding of *Mycoplasma* along microtracks. *Biochem Biophys Res*  
436 *Commun* 331(1):318-324.
- 437 34. Hiratsuka Y, Miyata M, Tada T, & Uyeda TQ (2006) A microrotary motor powered  
438 by bacteria. *Proc Natl Acad Sci U S A* 103(37):13618-13623.
- 439 35. Uenoyama A, Seto S, Nakane D, & Miyata M (2009) Regions on Gli349 and  
440 Gli521 protein molecules directly involved in movements of *Mycoplasma mobile*  
441 gliding machinery, suggested by use of inhibitory antibodies and mutants. *J*  
442 *Bacteriol* 191(6):1982-1985.
- 443 36. Jaffe JD, *et al.* (2004) The complete genome and proteome of *Mycoplasma mobile*.  
444 *Genome Res* 14(8):1447-1461.
- 445 37. Adan-Kubo J, Yoshii SH, Kono H, & Miyata M (2012) Molecular structure of  
446 isolated MvspI, a variable surface protein of the fish pathogen *Mycoplasma mobile*.

- 447 *J Bacteriol* 194(12):3050-3057.
- 448 38. Wu HN, Kawaguchi C, Nakane D, & Miyata M (2012) "Mycoplasmal antigen  
449 modulation," a novel surface variation suggested for a lipoprotein specifically  
450 localized on *Mycoplasma mobile*. *Curr Microbiol* 64(5):433-440.
- 451 39. Wu HN & Miyata M (2012) Whole surface image of *Mycoplasma mobile*,  
452 suggested by protein identification and immunofluorescence microscopy. *J*  
453 *Bacteriol* 194(21):5848-5855.
- 454 40. Kasai T, Hamaguchi T, & Miyata M (2015) Gliding motility of *Mycoplasma mobile*  
455 on uniform oligosaccharides. *J Bacteriol* 197(18):2952-2957.
- 456 41. Kasai T & Miyata M (2013) Analyzing inhibitory effects of reagents on  
457 *Mycoplasma* gliding and adhesion. *Bio-protocol* 3(14):e829.
- 458 42. Leidel C, Longoria RA, Gutierrez FM, & Shubeita GT (2012) Measuring molecular  
459 motor forces in vivo: implications for tug-of-war models of bidirectional transport.  
460 *Biophys J* 103(3):492-500.
- 461 43. Ito K & Akiyama Y (2005) Cellular functions, mechanism of action, and regulation  
462 of FtsH protease. *Annu Rev Microbiol* 59:211-231.
- 463 44. Mori H & Ito K (2006) Different modes of SecY-SecA interactions revealed by site-  
464 directed in vivo photo-cross-linking. *Proc Natl Acad Sci U S A* 103(44):16159-  
465 16164.
- 466 45. Gaurivaud P, *et al.* (2016) *Mycoplasma agalactiae* secretion of beta-(1-->6)-glucan,  
467 a rare polysaccharide in prokaryotes, is governed by high-frequency phase  
468 variation. *Appl Environ Microbiol* 82(11):3370-3383.
- 469 46. Beven L, *et al.* (2012) Specific evolution of F1-like ATPases in mycoplasmas. *PLoS*  
470 *One* 7(6):e38793.
- 471 47. Lauder GV (1984) Pressure and water flow patterns in the respiratory tract of the  
472 bass (*Micropterus salmoides*). *Journal of Experimental Biology* 113:151-164.
- 473 48. Schnitzer MJ & Block SM (1997) Kinesin hydrolyses one ATP per 8-nm step.  
474 *Nature* 388(6640):386-390.
- 475 49. Kojima H, Muto E, Higuchi H, & Yanagida T (1997) Mechanics of single kinesin  
476 molecules measured by optical trapping nanometry. *Biophys J* 73(4):2012-2022.
- 477 50. Takagi Y, Homsher EE, Goldman YE, & Shuman H (2006) Force generation in  
478 single conventional actomyosin complexes under high dynamic load. *Biophys J*



- 479 90(4):1295-1307.
- 480 51. Fujita K, Iwaki M, Iwane AH, Marcucci L, & Yanagida T (2012) Switching of  
481 myosin-V motion between the lever-arm swing and brownian search-and-catch. *Nat*  
482 *Commun* 3(956).
- 483 52. Park PJ & Lee KJ (2013) A modified active Brownian dynamics model using  
484 asymmetric energy conversion and its application to the molecular motor system. *J*  
485 *Biol Phys* 39(3):439-452.
- 486 53. Gennerich A, Carter AP, Reck-Peterson SL, & Vale RD (2007) Force-induced  
487 bidirectional stepping of cytoplasmic dynein. *Cell* 131(5):952-965.
- 488 54. Vilfan A (2005) Elastic lever-arm model for myosin V. *Biophys J* 88(6):3792-3805.
- 489 55. Metsugi S, *et al.* (2005) Sequence analysis of the gliding protein Gli349 in  
490 *Mycoplasma mobile*. *Biophysics (Nagoya-shi)* 1:33-43.
- 491 56. Kinoshita K, Jr., Yasuda R, Noji H, & Adachi K (2000) A rotary molecular motor  
492 that can work at near 100% efficiency. *Philos Trans R Soc Lond B Biol Sci*  
493 355(1396):473-489.
- 494 57. Aluotto BB, Wittler RG, Williams CO, & Faber JE (1970) Standardized  
495 bacteriologic techniques for the characterization of *Mycoplasma* species. *Int. J.*  
496 *Syst. Bacteriol.* 20:35-58.
- 497 58. Kinoshita Y, Uchida N, Nakane D, & Nishizaka T (2016) Direct observation of  
498 rotation and steps of the archaellum in the swimming halophilic archaeon  
499 *Halobacterium salinarum*. *Nat Microbiol* 1(11):16148.
- 500
- 501

502 **FIGURE LEGENDS**

503

504 **Fig. 1.** Schematic illustration of the gliding machinery. (A) Magnified illustration of  
505 a unit. The single unit consists of an internal structure (upper blue) and three huge  
506 proteins: Gli123 (purple), Gli349 (red), and Gli521 (green) on the cell surface. The  
507 force generated by the internal structure based on ATP hydrolysis is transmitted through  
508 Gli521 and pulls Gli349 repeatedly. Gli349 catches and pulls SOs on the solid surface;  
509 the unit force was estimated to be approximately 1.5 pN in the present study (see Fig.  
510 6). (B) Approximately 75 legs (red) projecting from the cell can work simultaneously.  
511 The cell glides in the direction of the yellow arrow. Unbound legs are not illustrated.

512

513 **Fig. 2.** Stall force of the various strains. (A) Left: Illustration and micrograph of  
514 measurement using optical tweezers. The polystyrene bead (circle) (1  $\mu\text{m}$  in diameter)  
515 bound to the cell is trapped by a focused laser beam (yellow hourglass) and glides in the  
516 direction of the white arrow. Black and pink crosses indicate the focal point of the  
517 laser and the bead center, respectively. Right: Optical micrographs of the trapped cell.  
518 The cell with the bead (large black ring with white center) was trapped at 0 s and stalled  
519 at 80 s. (B) Representative traces. The line colors correspond to the bars in the inset.  
520 Inset: Averages were normalized to the wild-type (WT) value, and are presented with  
521 standard deviations (SDs) ( $n = 50, 42, 26, 31, \text{ and } 35$ ). \*\*,  $P < 0.01$  (the difference  
522 from the WT was supported by the Student's  $t$ -test). The red broken line indicates the  
523 stall force for the WT.

524

525 **Fig. 3.** Binding and gliding properties of the various strains. (A) The cell trajectories  
526 are presented as a stack for 5 s, changing color from red to blue. (B) Averages of  
527 binding activity (right) and gliding speed (left) were normalized to the WT value and  
528 are presented with SDs.

529

530 **Fig. 4.** Effect of SL on stall force. (A) Representative traces at various  
531 concentrations of SL. (B) Concentration dependency on SL. Averages were plotted  
532 with SDs ( $n = 50, 13, 23, 16, 16, \text{ and } 11$  for 0, 0.05, 0.13, 0.25, 0.33, and 0.50 mM,  
533 respectively).

534

535 **Fig. 5.** Detection of force increments under low load and 0.25 mM SL. (A)  
536 Representative traces of force transition in the WT and *gli521* (P476R) mutants are  
537 shown in the upper and lower panels, respectively. Green and cyan triangles in each  
538 panel indicate small peak positions taken by a peak-finding algorithm adapted to IGOR  
539 Pro 6.33J. (B) Distributions of peak values detected by the peak-finding algorithm  
540 were fitted to the sum of four Gaussian curves. The first, second, third, and fourth tops  
541 of the Gaussian curves were 1.1, 2.0, 3.2, and 4.4 pN in the WT, and 1.0, 1.8, 2.6, and  
542 3.5 pN in the *gli521* (P476R) mutant, respectively ( $n = 976$  and  $1067$ ).

543

544 **Fig. 6.** Detection of force increments under low load and 0.50 mM SL. (A) Two  
545 representative time courses of force generation. The trajectories in the dashed  
546 rectangular areas are magnified as insets and marked as green and blue lines for  
547 increments and dwell times. (B) Representative time course of continuous stepwise  
548 trajectory. The histogram of PDF analysis for indicated steps is shown in the right  
549 inset. (C) The histogram of force increments for 46 steps or peaks. The averaged  
550 value is indicated by a black triangle.

551

552 **Fig. 7.** Leg behavior during stall. During pre-stall, the legs colored red repeatedly  
553 catch, pull, drag, and detach the SOs on the glass surface, thereby enabling cell  
554 propulsion. During stall, the force-transmitting legs are in equilibrium between  
555 attached and detached states. The yellow and black arrows indicate the gliding  
556 direction and the pulling force generated by the leg strokes, respectively.

557

558 **Fig. S1.** Distributions of gliding speed of the various strains over 10 s. Experimental  
559 data were fitted to the sum of two Gaussian curves colored blue.

560

561 **Movie S1.** Stall force of gliding cell carrying a bead measured using optical tweezers.

562

563 **Movie S2.** Stepwise movement of gliding cell carrying a bead detected with a weak  
564 trap.

**Fig. 1.** (Single column)

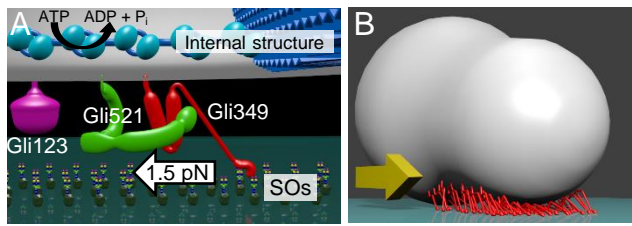

**Fig. 2.** (Single column)

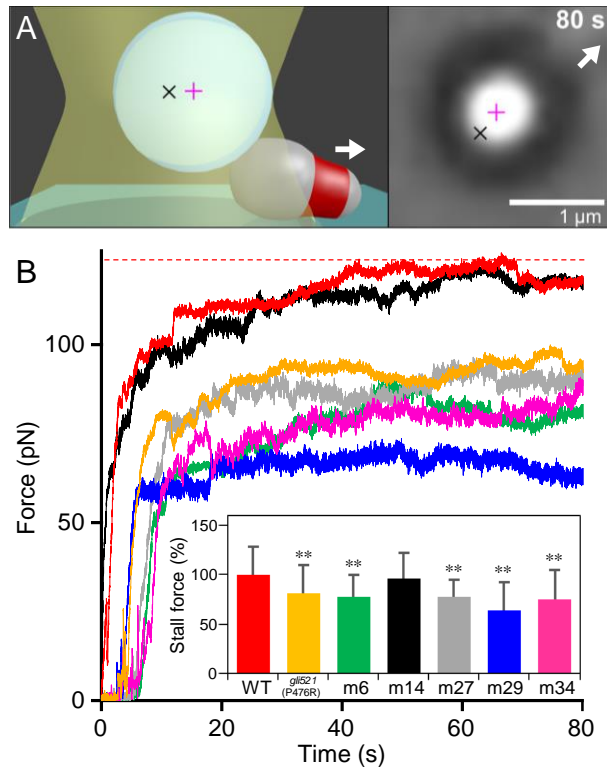

**Fig. 3.** (Double column)

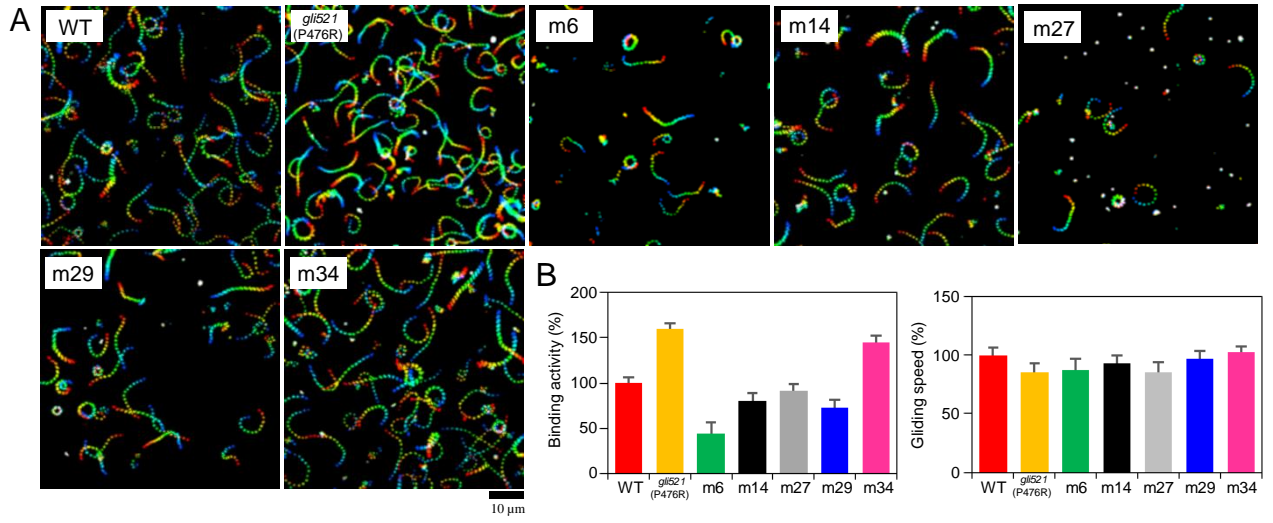

**Fig. 4.** (Single column)

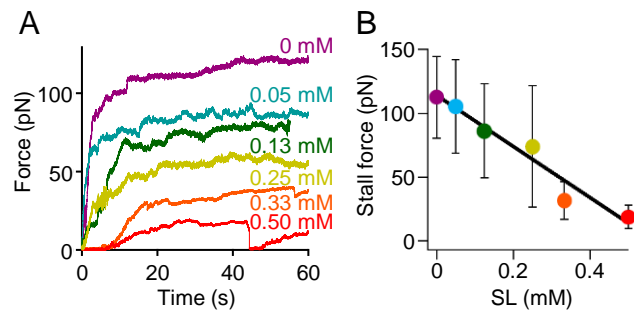

**Fig. 5.** (Single column)

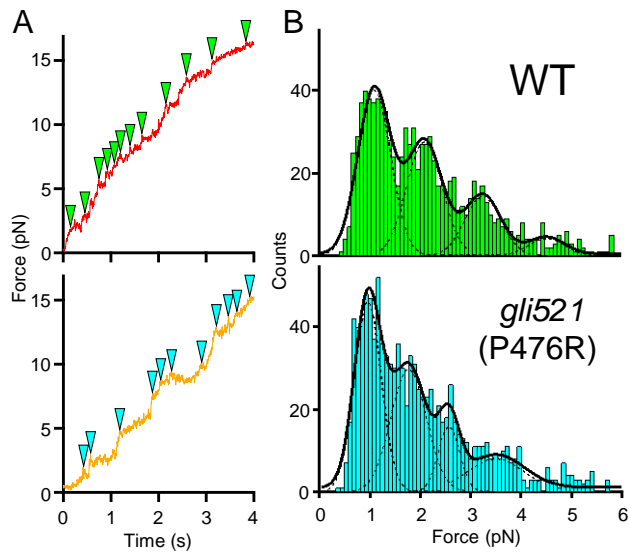



**Fig. 6.** (Double column)

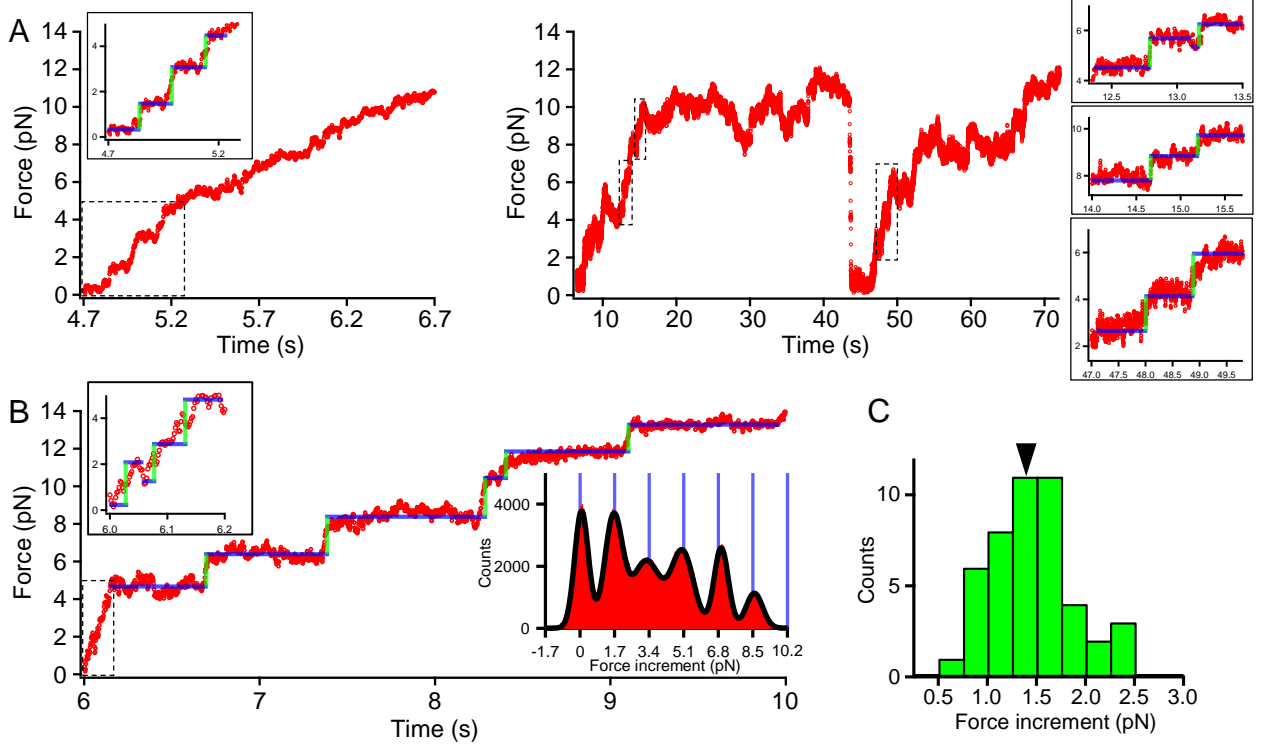

**Fig. 7.** (Single column)

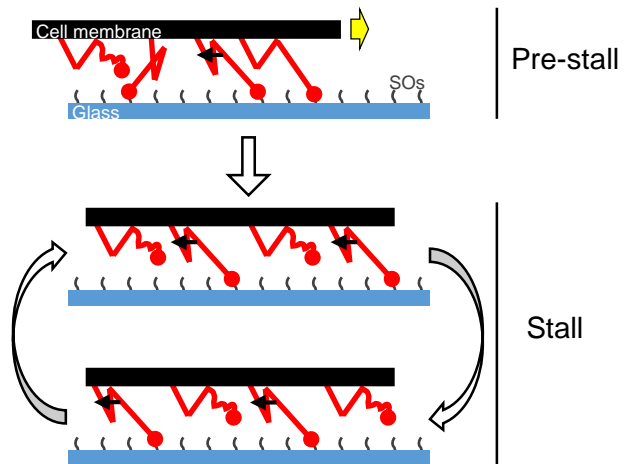

**Fig. S1.**

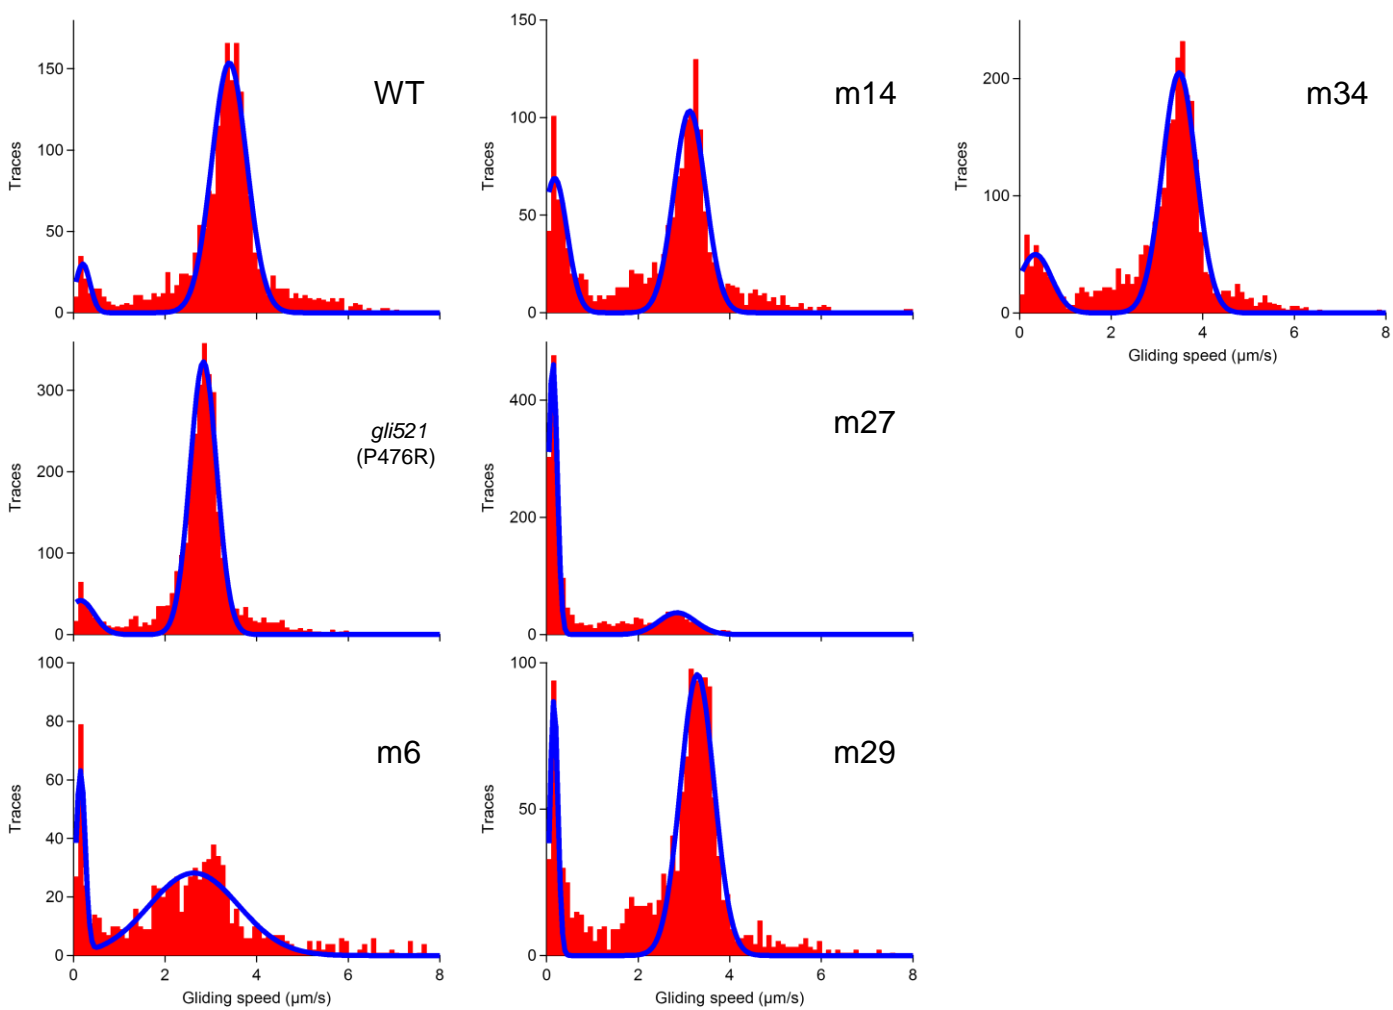

**TABLE S1** Whole genome sequence of various strains

| Strain                   | Nucleotide change <sup>a</sup> | Amino acid change <sup>b</sup> | Previously reported | Mutation type           | ORF                  | Annotation <sup>c</sup>                                      |
|--------------------------|--------------------------------|--------------------------------|---------------------|-------------------------|----------------------|--------------------------------------------------------------|
| WT                       | C232735A                       | S354I                          |                     | missense                | MMOB1700             | Hypothetical                                                 |
| <i>gli521</i><br>(P476R) | C149908G                       | P476R                          | P476R               | missense                | MMOB1040             | Gli521                                                       |
|                          | C232735A                       | S354I                          |                     | missense                | MMOB1700             | Hypothetical                                                 |
|                          | 399903T399904                  | M8–36*                         |                     | frame shift             | MMOB3220             | MvspB                                                        |
| m6                       | C232735A                       | S354I                          |                     | missense                | MMOB1700             | Hypothetical                                                 |
|                          | G308962A                       | G350R                          |                     | missense                | MMOB2540             | SecY preprotein translocase subunit                          |
|                          | C423006-<br>G676032C           | E225–230*<br>P191R             |                     | frame shift<br>missense | MMOB3340<br>MMOB5400 | MvspI<br>FtsH                                                |
| m12                      | C136968T                       | Q523*                          | Q523*               | nonsense                | MMOB1020             | Gli123                                                       |
|                          | T214208-<br>C232735A           | F672–695*<br>S354I             |                     | frame shift<br>missense | MMOB1570<br>MMOB1700 | Oligopeptide ABC transporter binding protein<br>Hypothetical |
|                          | A232903T                       | I298N                          |                     | missense                | MMOB1700             | Hypothetical                                                 |
|                          | C424498A                       | H195N                          |                     | missense                | MMOB3350             | PolC truncated DNA polymerase III                            |
| m13                      | C142646T                       | Q1257*                         | Q1257*              | nonsense                | MMOB1030             | Gli349                                                       |
|                          | C232735A                       | S354I                          |                     | missense                | MMOB1700             | Hypothetical                                                 |
| m14                      | C232735A                       | S354I                          |                     | missense                | MMOB1700             | Hypothetical                                                 |
|                          | 233458T233459<br>C272657A      | I113–142*<br>P156Q             |                     | frame shift<br>missense | MMOB1700<br>MMOB2030 | Hypothetical<br>Glucokinase                                  |
|                          | C147186T                       | S2770L                         | S2770L              | missense                | MMOB1030             | Gli349                                                       |
| m23                      | T214208-<br>C232735A           | F672–695*<br>S354I             |                     | frame shift<br>missense | MMOB1570<br>MMOB1700 | Oligopeptide ABC transporter binding protein<br>Hypothetical |
|                          | A233098C                       | I233S                          |                     | missense                | MMOB1700             | Hypothetical                                                 |
|                          | A345995T                       | N18Y                           |                     | missense                | MMOB2830             | HsdR Type I restriction enzyme r protein                     |
|                          | A73556G                        | L101L                          |                     | silent                  | MMOB0550             | Frr ribosome recycling factor                                |
| m27                      | C152863T                       | P1461L                         |                     | missense                | MMOB1040             | Gli521                                                       |
|                          | C232735A                       | S354I                          |                     | missense                | MMOB1700             | Hypothetical                                                 |
|                          | C232735A                       | S354I                          |                     | missense                | MMOB1700             | Hypothetical                                                 |
| m29                      | A587414T                       | K29N                           |                     | missense                | MMOB4660             | TruB tRNA pseudouridine synthase B                           |
|                          | C654504T                       | W82*                           |                     | nonsense                | MMOB5190             | Hypothetical                                                 |
|                          | A754250-<br>C232735A           | I126*<br>S354I                 |                     | frame shift<br>missense | MMOB6120<br>MMOB1700 | Hypothetical<br>Hypothetical                                 |
|                          | A232753G                       | I348T                          |                     | missense                | MMOB1700             | Hypothetical                                                 |
| m34                      | T365326A                       | D304V                          |                     | missense                | MMOB2960             | AtpD F <sub>0</sub> F <sub>1</sub> ATPase beta subunit       |

<sup>a</sup> Numbering is as in the sequence under accession number NC\_006908.<sup>b</sup> Asterisks indicate stop codons.<sup>c</sup> Annotations are based on Molligen 3.0.
